CORRECTION

# Correction: What Makes Sports Fans Interactive? Identifying Factors Affecting Chat Interactions in Online Sports Viewing

The *PLOS ONE* Staff

There are errors in the Funding section. The correct funding information is as follows:

This work was partly supported by Institute for Information & Communications Technology Promotion (IITP) grant funded by the Korea government (MSIP) (No.10041313, UX-oriented Mobile SW Platform) and the Sports Science Convergence Technology Development Program of the National Research Foundation of Korea (NRF) funded by the Ministry of Science, ICT & Future Planning (NRF-2014M3C1B1034033).

The publisher apologizes for the error.

## Reference

1. Ko M, Yeo J, Lee J, Lee U, Jang YJ (2016) What Makes Sports Fans Interactive? Identifying Factors Affecting Chat Interactions in Online Sports Viewing. *PLoS ONE* 11(2): e0148377. doi: [10.1371/journal.pone.0148377](https://doi.org/10.1371/journal.pone.0148377) PMID: [26849568](https://pubmed.ncbi.nlm.nih.gov/26849568/)

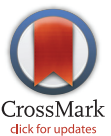

## OPEN ACCESS

**Citation:** The *PLOS ONE* Staff (2016) Correction: What Makes Sports Fans Interactive? Identifying Factors Affecting Chat Interactions in Online Sports Viewing. *PLoS ONE* 11(4): e0154550. doi:10.1371/journal.pone.0154550

**Published:** April 25, 2016

**Copyright:** © 2016 The PLOS ONE Staff. This is an open access article distributed under the terms of the [Creative Commons Attribution License](https://creativecommons.org/licenses/by/4.0/), which permits unrestricted use, distribution, and reproduction in any medium, provided the original author and source are credited.
